# Supplementary material for: One-pot reaction for the large-scale synthesis of hyperbranched polyglycerol-grafted Fe3O4 nanoparticles
Source: Royal Society of Chemistry journal article supplement (doi:10.1039/c3dt51532j), 2013-01-01
Supplement: c3dt51532j.pdf [file c3dt51532j.pdf]

## Supporting Information

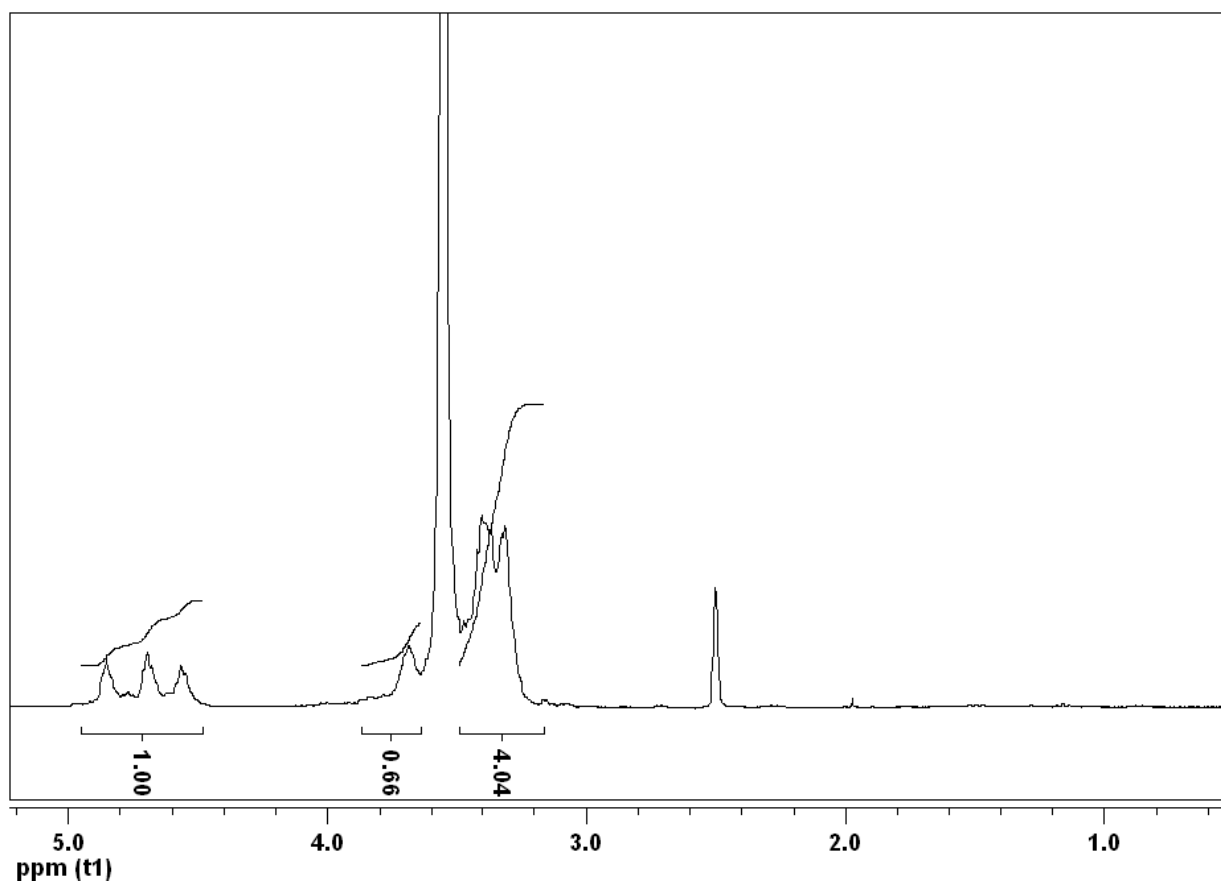

Figure S1.  $^1\text{H}$  NMR spectrum of surface grafted hyperbranched polyglycerol ( $d_6$ -DMSO)

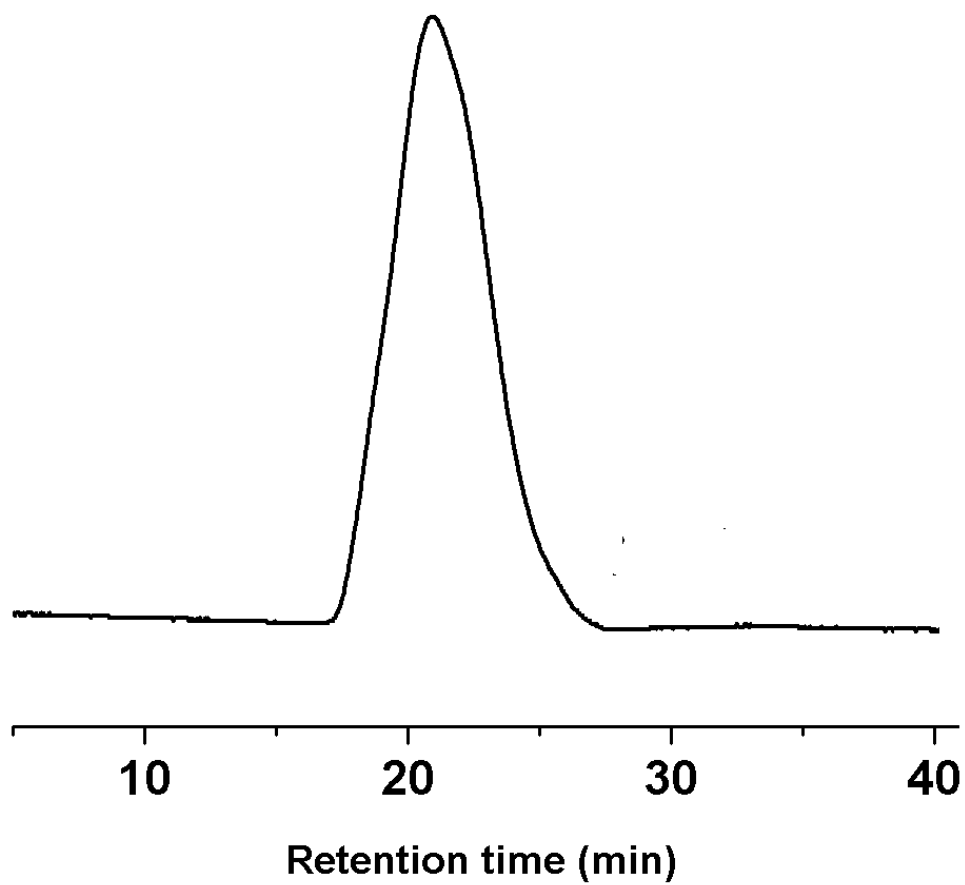

Figure S2. GPC curve of surface grafted hyperbranched polyglycerol
